# Supplementary material for: Fish Innate Immune Response to Viral Infection—An Overview of Five Major Antiviral Genes
Source: MDPI journal article supplement (doi:10.3390/v14071546), 2022-07-15
Supplement: s1 [file s1]

**Table S1.** In vivo stimulation of the antiviral genes reviewed in this work in the main species and groups of fish. (Numbers are the reference numbers in the Bibliography).

|                           |                  | <i>ifn</i>        | <i>mx</i>            | <i>vig</i> | <i>isg15</i> | <i>gig</i> |
|---------------------------|------------------|-------------------|----------------------|------------|--------------|------------|
| ssRNA viruses             | Carp             | 34,35,36,43,47    | 43                   | 47         | 43           |            |
|                           | Zebrafish        | 24,25,26,40,42,46 | 25,27,32,38,40       | 32         | 32           | 41         |
|                           | Rainbow trout    | 51                | 51,52,54,56,123      |            |              |            |
|                           | Salmon           | 59                | 53,55,57,58,61       | 63         | 63           | 60,63      |
|                           | Perciforms       | 70,71,75,76       | 69,70,71,72,73,75,76 | 70         |              |            |
|                           | Pleuronectiforms |                   | 64,66                |            |              |            |
| Poly I:C<br>dsRNA viruses | Carp             |                   | 88                   |            | 87           |            |
|                           | Zebrafish        | 84,85             |                      |            |              |            |
|                           | Rainbow trout    |                   | 123                  |            |              |            |
|                           | Salmon           | 99,100,102        | 57,59,99,100,101     | 99,104     | 99           |            |
|                           | Perciforms       | 95                | 95                   |            |              |            |
|                           | Pleuronectiforms |                   | 109                  |            |              |            |
| DNA viruses               | Carp             | 115               |                      |            |              |            |
|                           | Perciforms       |                   | 114                  |            |              |            |
|                           | Pleuronectiforms |                   | 111,112              |            |              |            |
